# Supplementary material
Source: publisher figshare collection journal article supplement (https://acs.figshare.com/ndownloader/files/34180279)
Supplement: Supplementary file 1 [file 34180279]

## **Collision-Induced Dissociation of Cellobiose and Maltose**

Hock-Seng Ngan<sup>1</sup>, Shang-Ting Tsai<sup>1</sup>, and Chi-Kung Ni<sup>1,2\*</sup>

<sup>1</sup> Institute of Atomic and Molecular Sciences, Academia Sinica, P. O. Box 23-166, Taipei 10617, Taiwan

<sup>2</sup> Department of Chemistry, National Tsing Hua University, Hsinchu, 30013, Taiwan

\*Email address: [ckni@po.iam.s.sinica.edu.tw](mailto:ckni@po.iam.s.sinica.edu.tw)

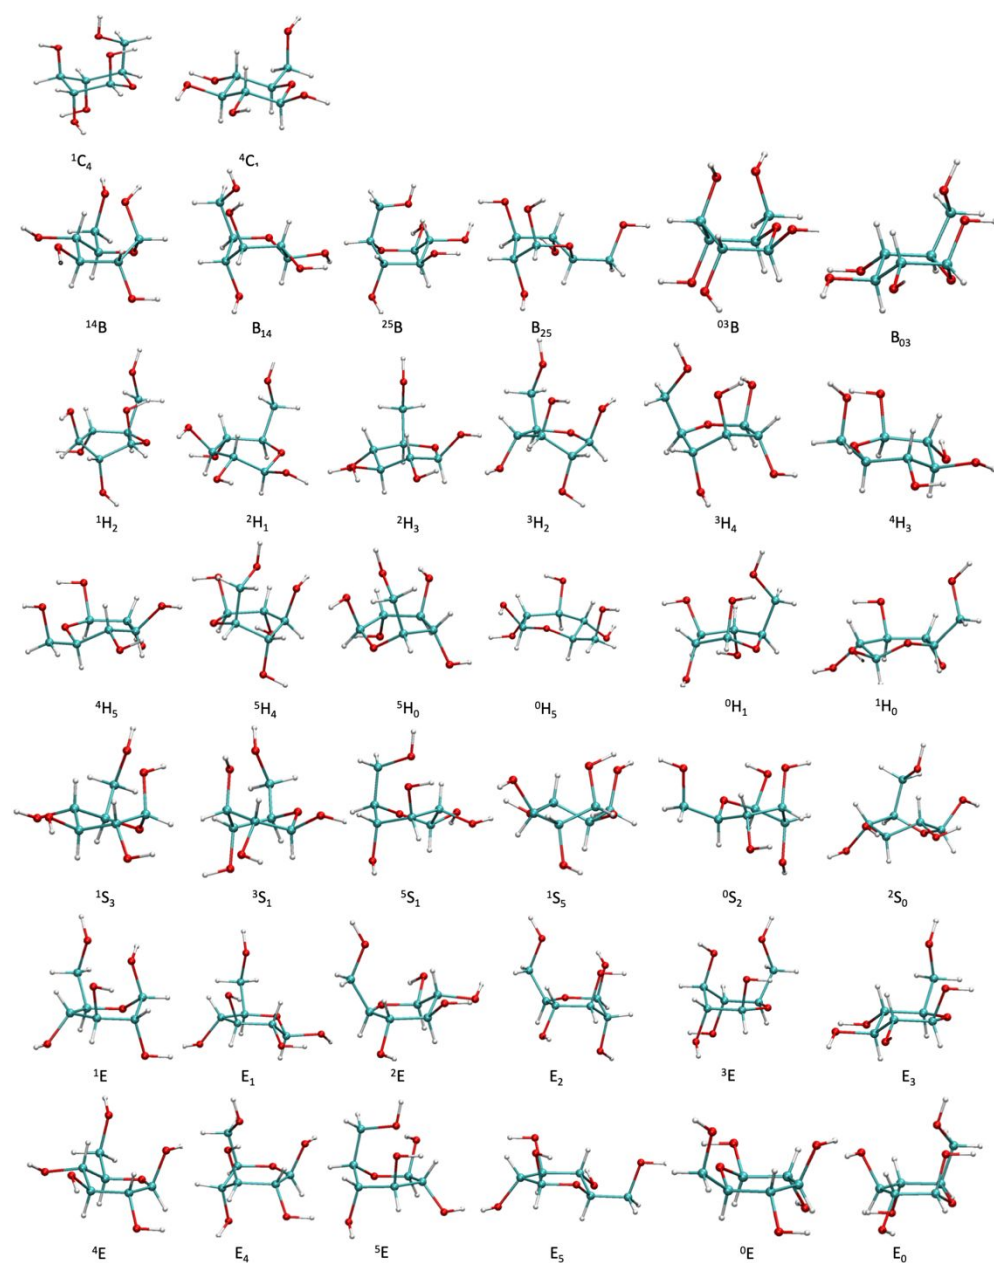

Figure S1. The schematic drawing of  $\beta$ -glucose molecules with 38 different Cremer-Pople<sup>1</sup> puckering forms.

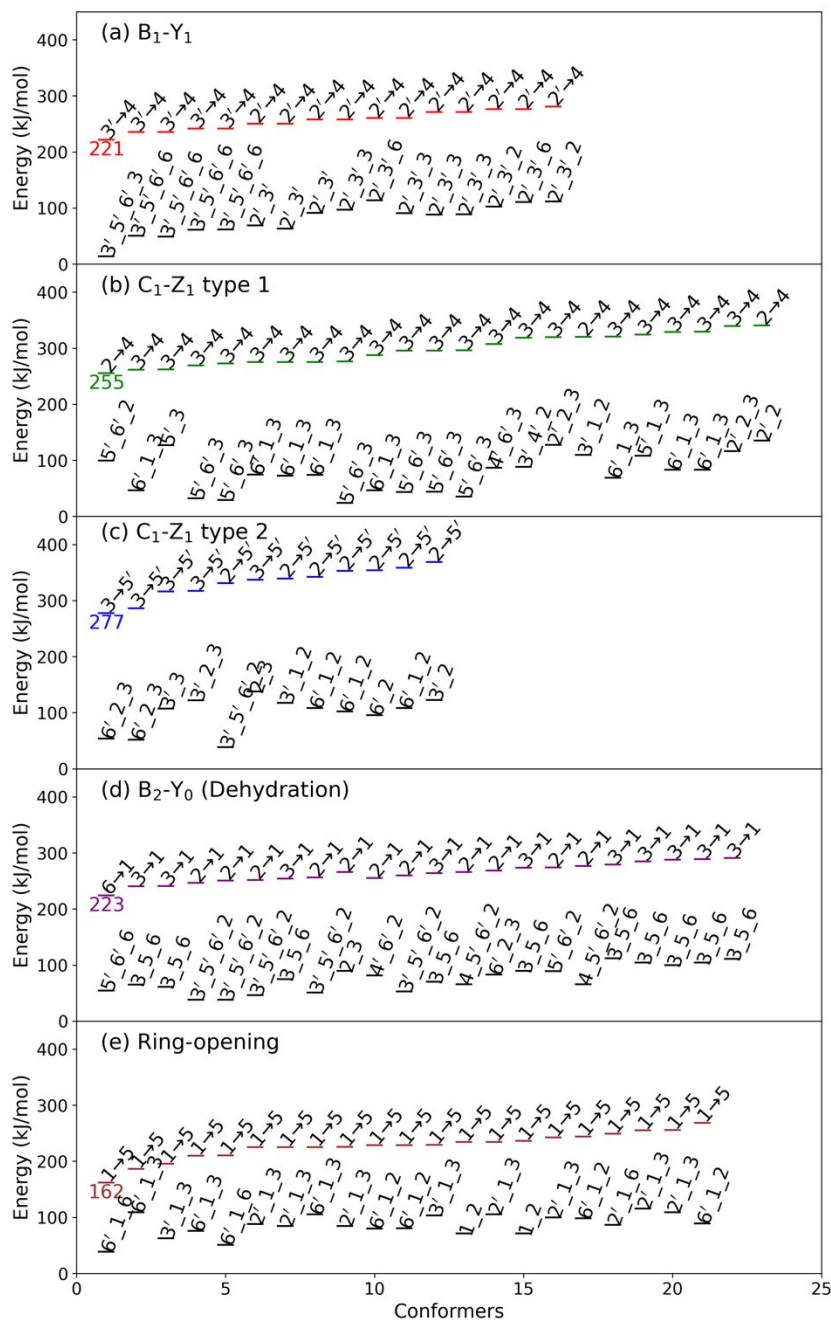

Figure S2. The energies of the transition states (TS) and the reactants of  $\beta$ -cellobiose obtained by DFT/B3LYP calculations for different reactions. (a)  $B_1$ - $Y_1$  fragmentation, (b)  $C_1$ - $Z_1$  type 1 fragmentation, (c)  $C_1$ - $Z_1$  type 2 fragmentation, (d)  $B_2$ - $Y_0$  fragmentation (dehydration) and (e) ring-opening. The energy is relative the energy of global minimum structure. The red, green, blue, purple, and brown lines mark the TS energies. Right about the TS dash lines, the H-atom transfer that responsible for the TS is written, where  $A \rightarrow B$  means H-atom transfer from atom A to atom B. The black dash lines right below each TS dash line marks the energies of the reactant states corresponds to each TS, where the series of numbers represent the O-atoms that bind to a sodium ion.

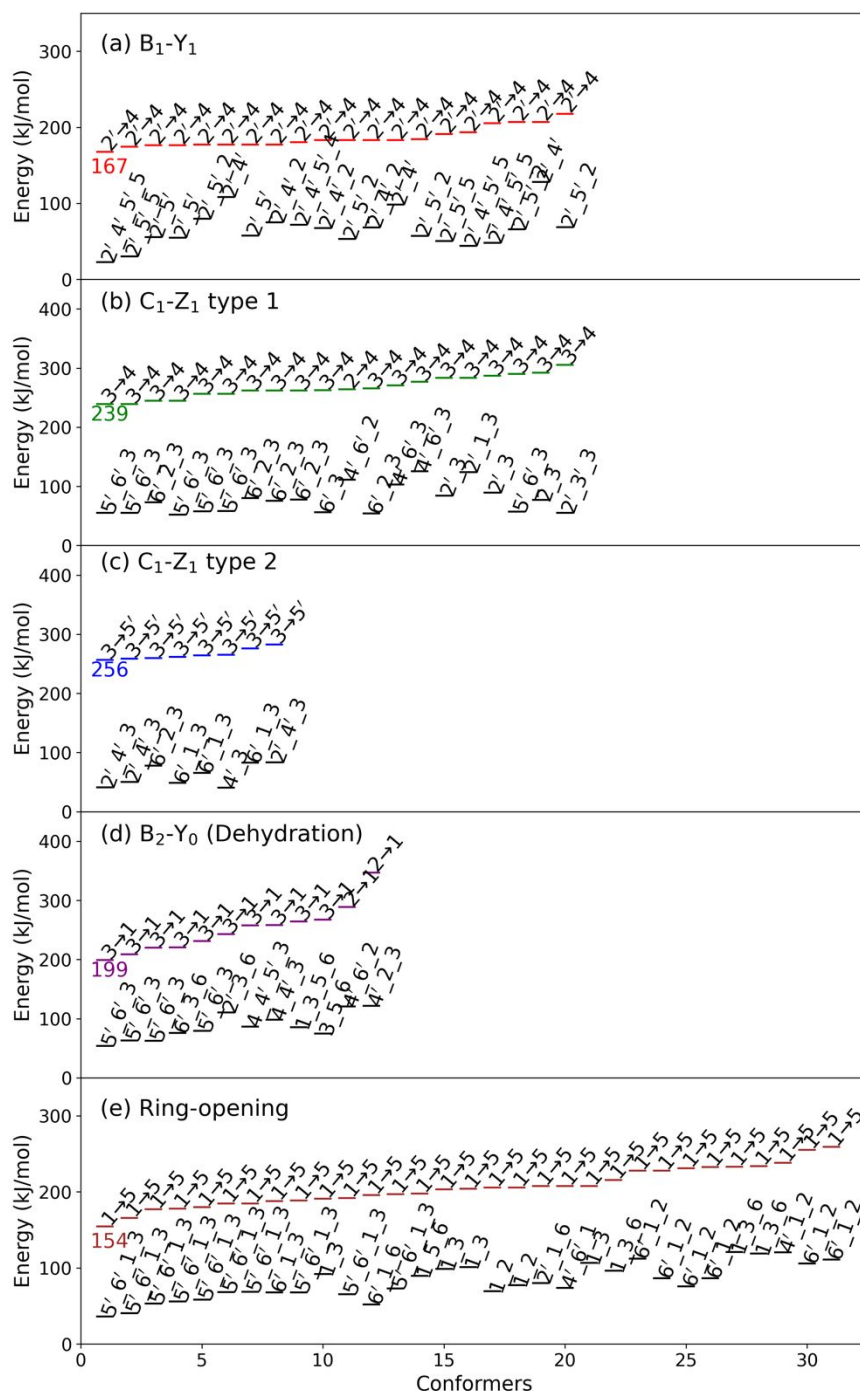

## Reference

1. Cremer, D. t.; Pople, J., General definition of ring puckering coordinates. *J. Am. Chem. Soc.* **1975**, 97 (6), 1354-1358.
